# Supplementary material for: Cryo-EM Structures Reveal Tau Filaments from Down Syndrome Adopt Alzheimer’s Disease Fold
Source: PubMed Central journal article supplement — bioRxiv. 2024 Apr 3:2024.04.02.587507. Preprint. [Version 1] doi: 10.1101/2024.04.02.587507 (PMC11014571; doi:10.1101/2024.04.02.587507), 2024-04-03
Supplement: NIHPP2024.04.02.587507v1-supplement-1.pdf [file NIHPP2024.04.02.587507v1-supplement-1.pdf]

## SUPPLEMENTARY INFORMATION

### Cryo-EM Structures Reveal Tau Filaments from Down Syndrome Adopt Alzheimer's Disease Fold

**AUTHORS:** Ujjayini Ghosh<sup>1†</sup>, Eric Tse<sup>1†</sup>, Marie Shi<sup>1</sup>, Hyunjun Yang<sup>1</sup>, Feng Wang<sup>3</sup>, Gregory E. Merz<sup>1,2</sup>, Stanley B. Prusiner<sup>1,2,3</sup>, Daniel R. Southworth<sup>1,3\*</sup>, Carlo Condello<sup>1,2\*</sup>

#### AFFILIATIONS:

<sup>1</sup>Institute for Neurodegenerative Diseases; University of California, San Francisco; San Francisco, CA 94158, USA

<sup>2</sup>Department of Neurology, University of California San Francisco; San Francisco, CA, USA

<sup>3</sup>Department of Biochemistry and Biophysics, University of California San Francisco; San Francisco, CA, USA

†Equal Contribution

\*Correspondence: [daniel.southworth@ucsf.edu](mailto:daniel.southworth@ucsf.edu); [carlo.condello@ucsf.edu](mailto:carlo.condello@ucsf.edu)

**KEY WORDS:** Down syndrome, Alzheimer's disease, tauopathy, protein conformation, cryo-electron microscopy

## Supplementary Figure S1

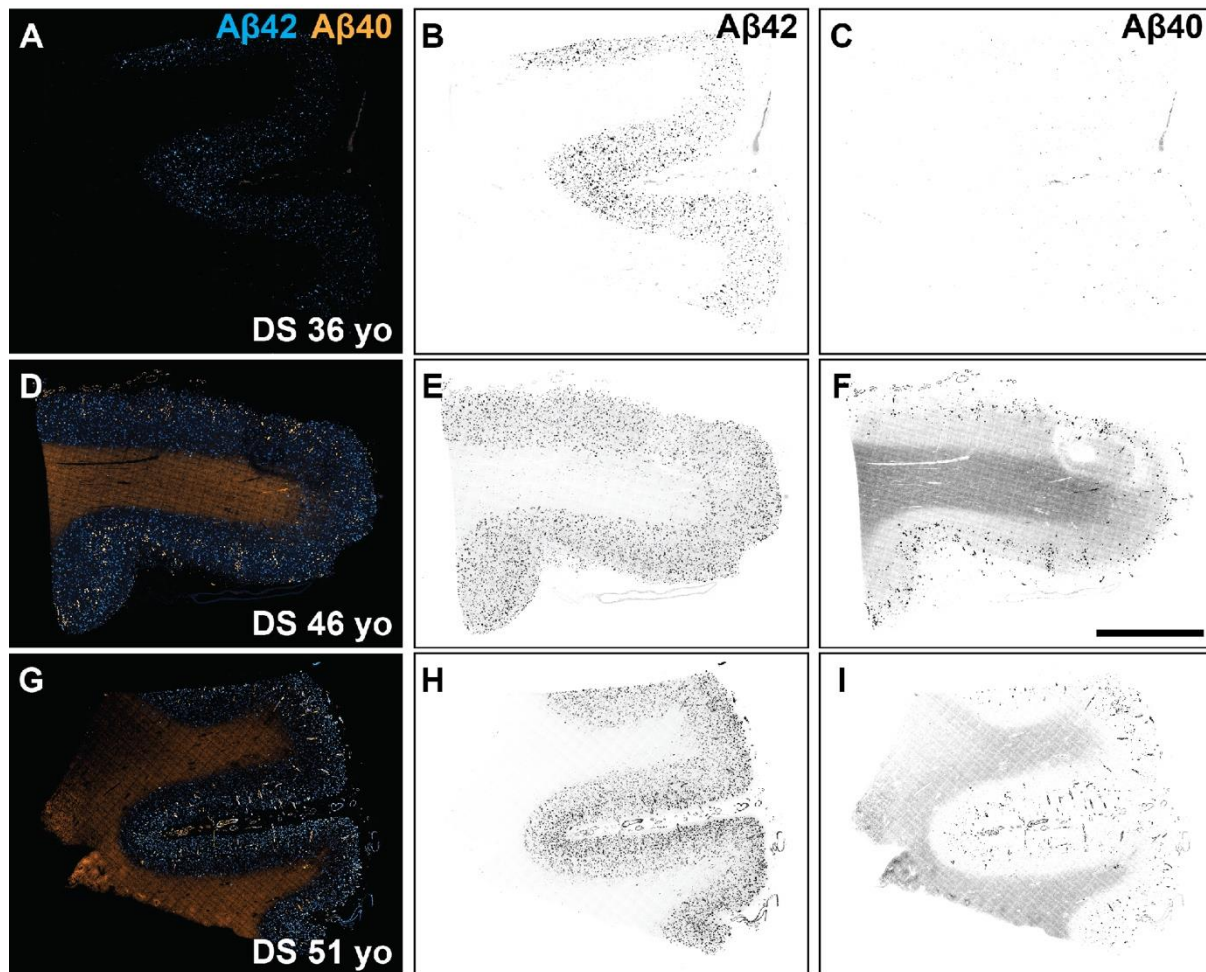

**Supplementary Figure S1:** Fluorescence images of immunolabeled A $\beta$ 42 and A $\beta$ 40 plaques in DS brain samples used for cryo-EM experiments. Formalin-fixed frontal cortex sections stained with A $\beta$  isotype-specific antibodies against c-terminal length isoforms A $\beta$ 42 (cyan) and A $\beta$ 40 (orange) in DS case 6, 36 year old (A-C), DS case 3, 46 year old (D-F), and DS case 2, 51 year old (G-I). Individual fluorescence channels were converted to greyscale and inverted for A $\beta$ 42 (B, E, H) and A $\beta$ 40 (C, F, I). Scale bar = 2 mm.

## Supplementary Figure S2

Case 1 (63y)

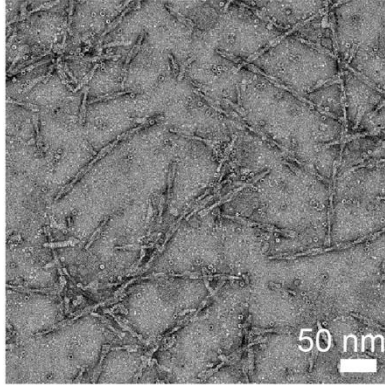

Case 2 (51y)

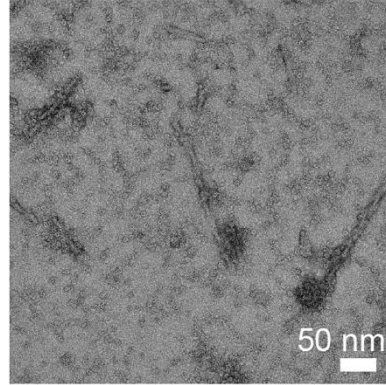

Case 3 (46y)

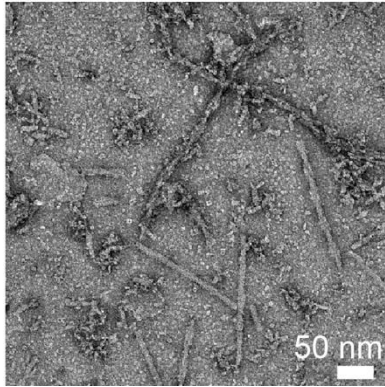

Case 4 (36y)

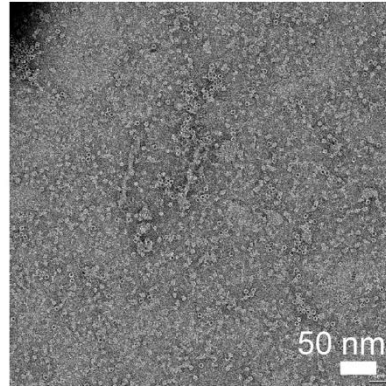

**Supplementary Figure S2.** Negative stain EM images of sarkosyl insoluble tau following isolation from frontal cortex of DS cases (indicated) to show fibrils and other background contaminants.

## Supplementary Figure S3

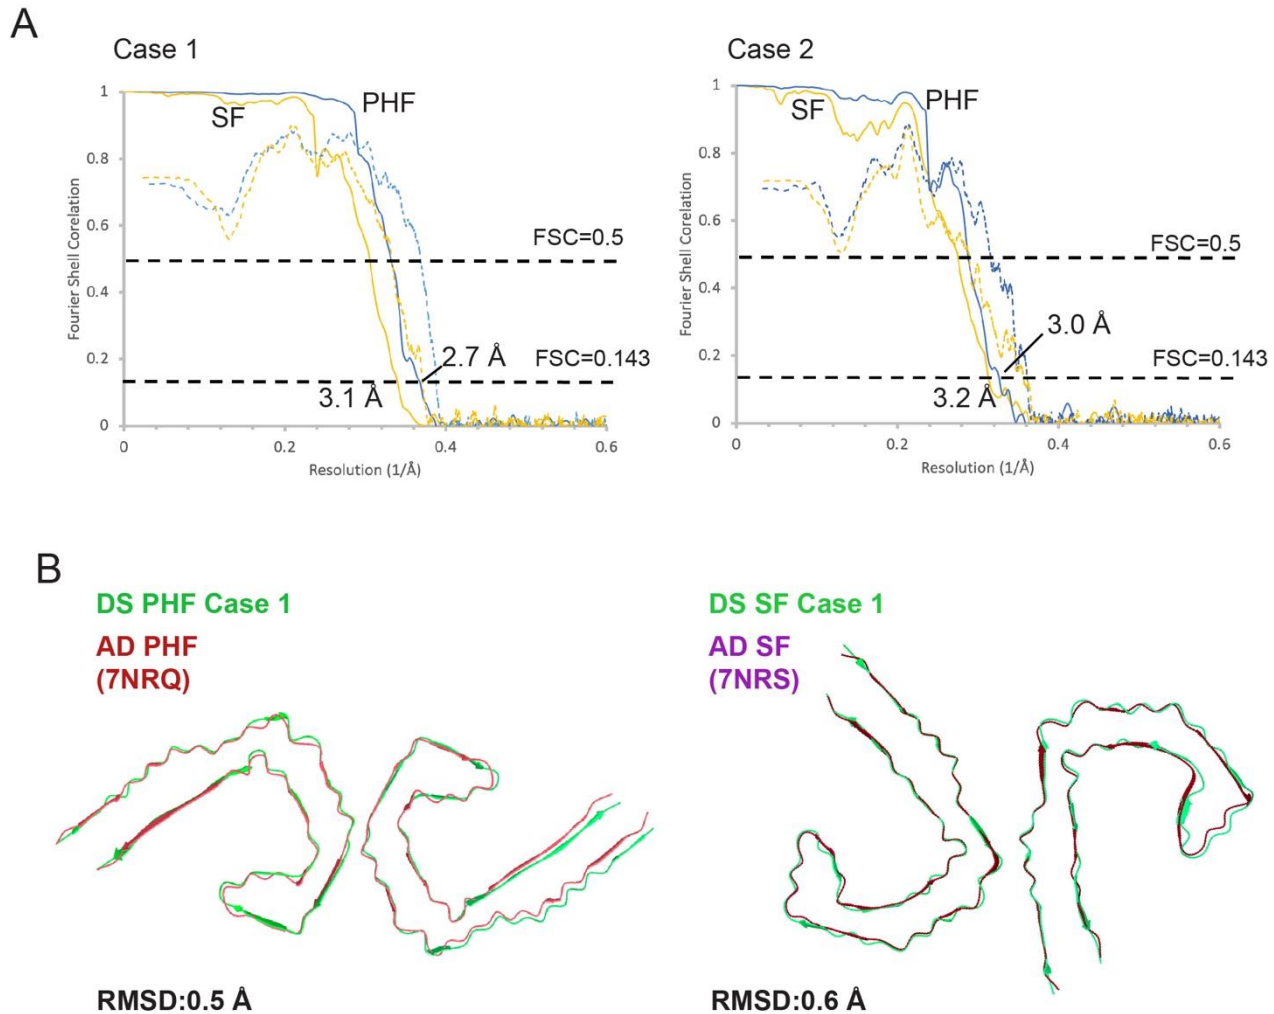

**Supplementary Figure S3.** Cryo-EM structure analysis. (A) Fourier shell correlation (FSC) curves of two independently refined half maps for the PHF (Blue) and SF (Orange) showing resolution at FSC=0.143 and corresponding map vs. model curves (dashed) and FSC=0.5 line. (B) Overlay and  $\alpha$ -carbon RMSD values for the PHF and SF structures from case 1 compared to published structures (PDB: 7NRQ and 7NRS, respectively).

## Supplementary Fig. S4

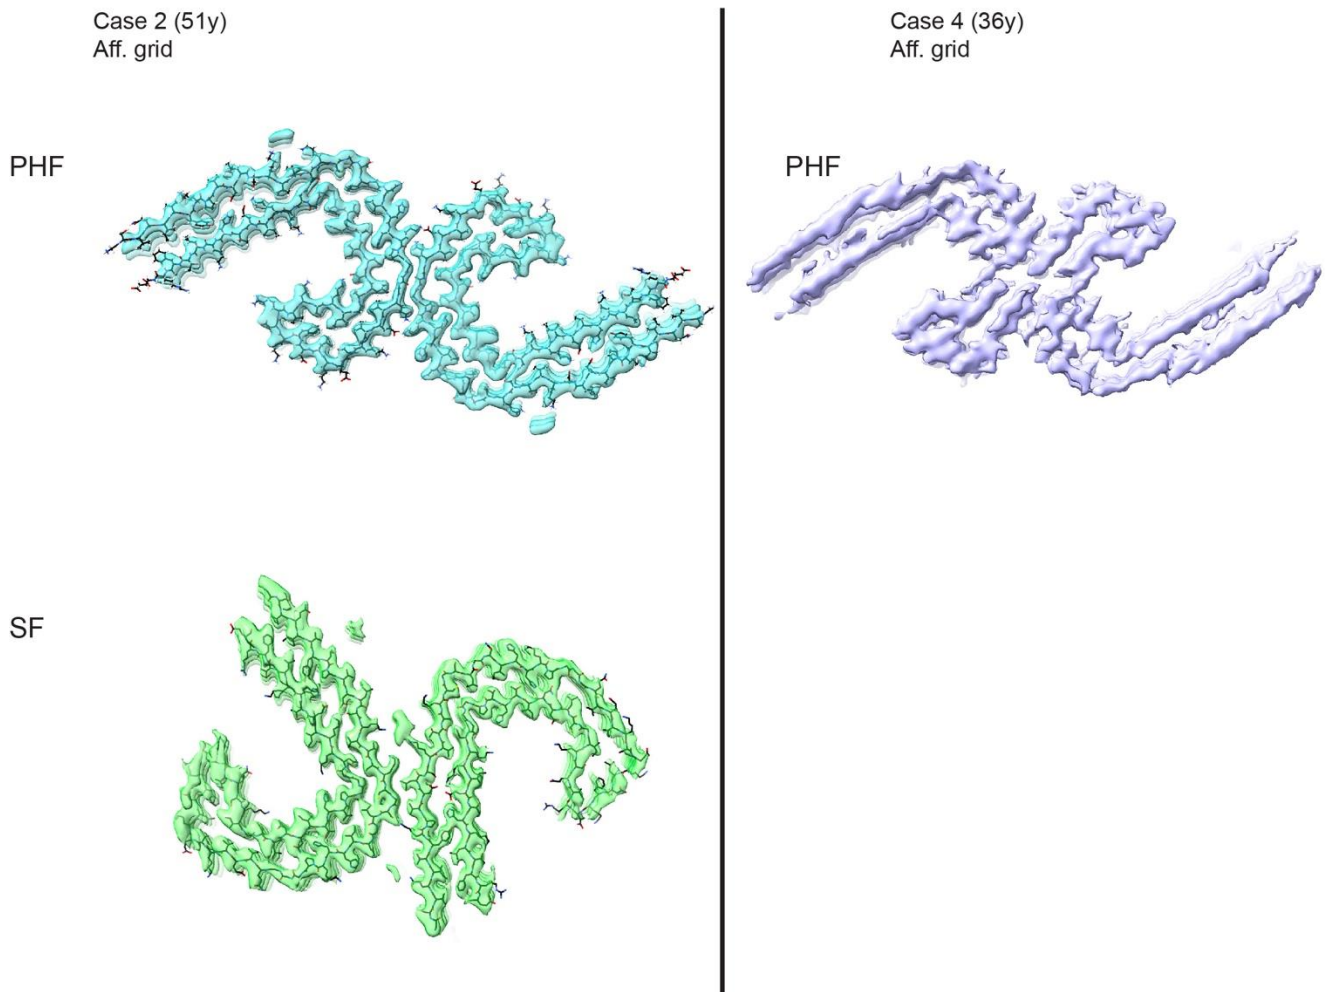

**Supplementary Figure S4.** Final cryoEM refined maps of tau PHF and SF from data acquired using GO-AT8 affinity grids to isolate tau filaments. For DS case 2 both PHF and SF structures were solved to 3.0 and 3.2 Å resolution, respectively (left), and for case 4 the PHF map was solved to 5 Å resolution (right).



| Brain Bank | ID         | Disease | Region          | UMAP name | Age at death | Sex | APOE                    | Postmortem interval (hours) | Xtau neuropath score | XA $\beta$ neuropath score |
|------------|------------|---------|-----------------|-----------|--------------|-----|-------------------------|-----------------------------|----------------------|----------------------------|
| KCL        | A035/03    | AD      | Frontal cortex  | AD 1      | 59           | F   | ND                      | 36                          | 4                    | 4                          |
| KCL        | A061/03    | AD      | Frontal cortex  | AD 2      | 55           | M   | ND                      | 18                          | 4                    | 4                          |
| OXF        | NP177-2013 | AD      | Frontal cortex  | AD 3      | 90           | F   | $\epsilon 3/\epsilon 3$ | 48                          | 4                    | 3                          |
| UCI        | 14-08      | AD      | Frontal cortex  | AD 4      | 86           | M   | $\epsilon 3/\epsilon 3$ | 4                           | 2                    | 2                          |
| UCI        | 37-15      | AD      | Frontal cortex  | AD 5      | 87           | F   | $\epsilon 3/\epsilon 4$ | 4                           | 2                    | 3                          |
| UCI        | 4-02       | AD      | Frontal cortex  | AD 6      | 83           | M   | $\epsilon 3/\epsilon 4$ | 3                           | 4                    | 3                          |
| BCN        | 907        | DS      | Frontal cortex  | DS 1      | 63           | M   | $\epsilon 3/\epsilon 3$ | 6                           | 4                    | 3                          |
| BCN        | 714        | DS      | Frontal cortex  | DS 2      | 36           | F   | $\epsilon 3/\epsilon 3$ | 12                          | 2                    | 2                          |
| UMD        | 4335       | DS      | Frontal cortex  | DS 3      | 28           | M   | $\epsilon 4/\epsilon 4$ | 26                          | 2                    | 2                          |
| UMD        | 4870       | DS      | Frontal cortex  | DS 4      | 51           | F   | $\epsilon 2/\epsilon 3$ | 4                           | 4                    | 4                          |
| UMD        | 5510       | DS      | Frontal cortex  | DS 5      | 65           | M   | $\epsilon 3/\epsilon 3$ | 10                          | 4                    | 4                          |
| UMD        | 5600       | DS      | Frontal cortex  | DS 6      | 57           | M   | $\epsilon 3/\epsilon 3$ | 6                           | 4                    | 3                          |
| UCI        | 29-06      | DS      | Frontal cortex  | -         | 45           | F   | $\epsilon 3/\epsilon 3$ | 3                           | 4                    | 4                          |
| UCI        | 29-06      | DS      | Temporal cortex | -         | 45           | F   | $\epsilon 3/\epsilon 3$ | 3                           | -                    | -                          |
| UCI        | 3-17       | DS      | Frontal cortex  | -         | 57           | M   | $\epsilon 3/\epsilon 3$ | 4                           | 3                    | 4                          |
| UCI        | 3-17       | DS      | Temporal cortex | -         | 57           | M   | $\epsilon 3/\epsilon 3$ | 4                           | -                    | -                          |
| UCI        | 30-00      | DS      | Frontal cortex  | -         | 61           | M   | $\epsilon 3/\epsilon 3$ | 11                          | 4                    | 4                          |
| UCI        | 30-00      | DS      | Temporal cortex | -         | 61           | M   | $\epsilon 3/\epsilon 3$ | 11                          | -                    | -                          |
| UCI        | 46-94      | DS      | Frontal cortex  | -         | 62           | F   | $\epsilon 3/\epsilon 3$ | 3                           | 4                    | 4                          |
| UCI        | 46-94      | DS      | Temporal cortex | -         | 62           | F   | $\epsilon 3/\epsilon 3$ | 3                           | -                    | -                          |
| UCI        | 30-05      | DS      | Frontal cortex  | -         | 57           | F   | $\epsilon 3/\epsilon 3$ | 3                           | 4                    | 4                          |
| UCI        | 30-05      | DS      | Temporal cortex | -         | 57           | F   | $\epsilon 3/\epsilon 3$ | 3                           | -                    | -                          |

**Supplementary Table S2:** Fixed postmortem donor tissues used for EMBER analysis.

|                                   | Case 1                       |              | Case 2                     |              | Case 3                         |              | Case 4                     |                  |
|-----------------------------------|------------------------------|--------------|----------------------------|--------------|--------------------------------|--------------|----------------------------|------------------|
| <b>Data collection</b>            | PHFs                         | SFs          | PHFs                       | SFs          | PHFs                           | SFs          | PHFs                       | CTE/SSPE-II-like |
| Magnification                     | x105,000                     | x105,000     | x105,000                   | x105,000     | x105,000                       | x105,000     | x105,000                   | x105,000         |
| Defocus range (mm)                | -0.8 to -1.8                 | -0.8 to -1.8 | -0.8 to -1.8               | -0.8 to -1.8 | -0.8 to -1.8                   | -0.8 to -1.8 | -0.8 to -1.8               | -0.8 to -1.8     |
| Voltage (kV)                      | 300                          | 300          | 300                        | 300          | 300                            | 300          | 300                        | 300              |
| Microscope                        | Titan Krios                  | Titan Krios  | Titan Krios                | Titan Krios  | Titan Krios                    | Titan Krios  | Titan Krios                | Titan Krios      |
| Detector                          | Gatan K3                     | Gatan K3     | Gatan K3                   | Gatan K3     | Gatan K3                       | Gatan K3     | Gatan K3                   | Gatan K3         |
| Frame exposure time (s)           | 2.024                        | 2.024        | 2.024                      | 2.024        | 2.024                          | 2.024        | 2.024                      | 2.024            |
| Dose rate (e-/physical pixel/sec) | 16                           | 16           | 16                         | 16           | 16                             | 16           | 16                         | 16               |
| Total dose (e-/Å <sup>2</sup> )   | 46                           | 46           | 46                         | 46           | 46                             | 46           | 46                         | 46               |
| Pixel size (Å)                    | 0.834                        | 0.834        | 0.834                      | 0.834        | 0.834                          | 0.834        | 0.834                      | 0.834            |
| Movies collected                  | 9160                         |              | 5902                       |              | 6949                           |              | 1293                       |                  |
| <b>Grids &amp; sample</b>         | Conventional grids & Pronase |              | Affinity grid & no Pronase |              | Conventional grid & no Pronase |              | Affinity grid & no Pronase |                  |
| <b>Reconstruction</b>             |                              |              |                            |              |                                |              |                            |                  |
| Box size (pixel)                  | 280                          | 280          | 280                        | 280          | 280                            | 280          | 280                        | 280              |
| Inter-box distance (Å)            | 17                           | 17           | 17                         | 17           | 17                             | 17           | 17                         | 17               |
| Total segments*                   | 1127462                      | 329537       | 7488898                    | 287943       | 271767                         | 86388        | 197928                     | 17473            |
| Final Particles (no.)             | 215640                       | 47801        | 79599                      | 26964        | 47264                          | 35177        | 32831                      | N/A**            |
| Resolution (Å)                    | 2.7                          | 3            | 3.1                        | 3.2          | 2.9                            | 3.1          | 5                          | 7.8              |
| B-factor (Å <sup>2</sup> )        | -83.71                       | -81.34       | -89.69                     | -71.29       | -68.79                         | -90.05       | -262.95                    | -415.37          |
| Helical rise (Å)                  | 2.39                         | 4.81         | 2.37                       | 4.77         | 2.4                            | 4.81         | 2.3                        | 2.38             |
| Helical twist (°)                 | 179.45                       | -1.08        | 179.5                      | -1.04        | 179.48                         | -1.06        | 179.45                     | 179.55           |
| *after initial 2D classification  |                              |              |                            |              |                                |              |                            |                  |
| **no subsequent classification    |                              |              |                            |              |                                |              |                            |                  |

**Supplementary Table S3: Cryo-EM data collection and structure determination.**



| Model                        | Case 1     |            | Case 2     |            |
|------------------------------|------------|------------|------------|------------|
|                              | PHFs       | SFs        | PHFs       | SFs        |
| model resolution             | 2.7        | 3.0        | 3.1        | 3.5        |
| atoms                        | 35910      | 39501      | 40698      | 39513      |
| Residues                     | 2310       | 2541       | 2618       | 2541       |
| Bonds (RMSD)                 |            |            |            |            |
| Length (Å) (# > 4 $\sigma$ ) | 0.010 (0)  | 0.010 (0)  | 0.010 (0)  | 0.011 (0)  |
| angles (°) (# > 4 $\sigma$ ) | 1.717 (92) | 1.791 (70) | 1.871 (38) | 1.914 (95) |
| MolProbity score             | 2.21       | 2.32       | 2.53       | 2.63       |
| Clash score                  | 18.87      | 32.66      | 40.97      | 46.84      |
| Ramachandran plot (%)        |            |            |            |            |
| Outliers                     | 0.00       | 0.00       | 0.00       | 1.33       |
| Allowed                      | 6.67       | 4.69       | 6.67       | 6.67       |
| Favored                      | 93.33      | 95.31      | 93.33      | 92         |
| Rotamer outliers (%)         | 0.00       | 0.00       | 0.00       | 0.00       |

**Supplementary Table S4: Cryo-EM Model Building.**
